# Supplementary material for: Tryptophanhydroxamic Acid-Stabilized Ultrasmall Gold Nanoclusters: Tuning the Selectivity for Metal Ion Sensing
Source: MDPI journal article supplement (doi:10.3390/nano14050434), 2024-02-27
Supplement: s1 [file s1]

## SUPPORTING INFORMATION

# Tryptophanhydroxamic Acid-Stabilized Ultrasmall Gold Nanoclusters: Tuning the Selectivity for Metal Ion Sensing

Gyöngyi Gombár <sup>1</sup>, Ditta Ungor <sup>1</sup>, István Szatmári <sup>2,3</sup>, Ádám Juhász <sup>1,4,\*</sup> and Edit Csapó <sup>1,4,\*</sup>

<sup>1</sup> MTA-SZTE Lendület “Momentum” Noble Metal Nanostructures Research Group, University of Szeged, Rerrich B. sqr. 1, H-6720 Szeged, Hungary

<sup>2</sup> Institute of Pharmaceutical Chemistry, University of Szeged, Eötvös u. 6, H-6720 Szeged, Hungary

<sup>3</sup> Stereochemistry Research Group, Eötvös Loránd Research Network, University of Szeged, Eötvös u. 6, H-6720 Szeged, Hungary

<sup>4</sup> Interdisciplinary Excellence Center, Department of Physical Chemistry and Materials Science, University of Szeged, Rerrich B. sqr. 1, H-6720 Szeged, Hungary

\* Correspondence: juhaszad@chem.u-szeged.hu (Á.J.); juhaszne.csapo.edit@med.u-szeged.hu (E.C.)

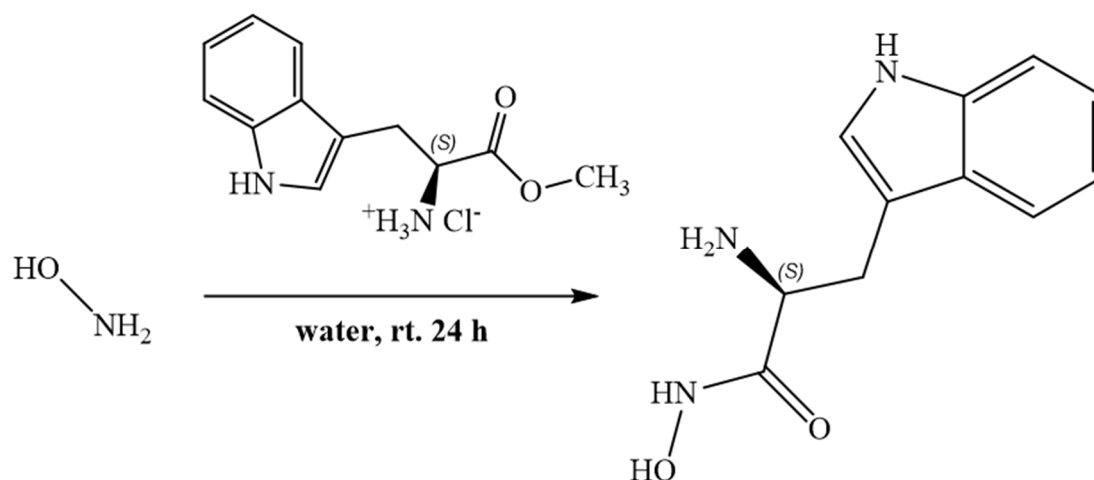

**Figure S1.** Synthesis protocol of the TrpHA ligand.

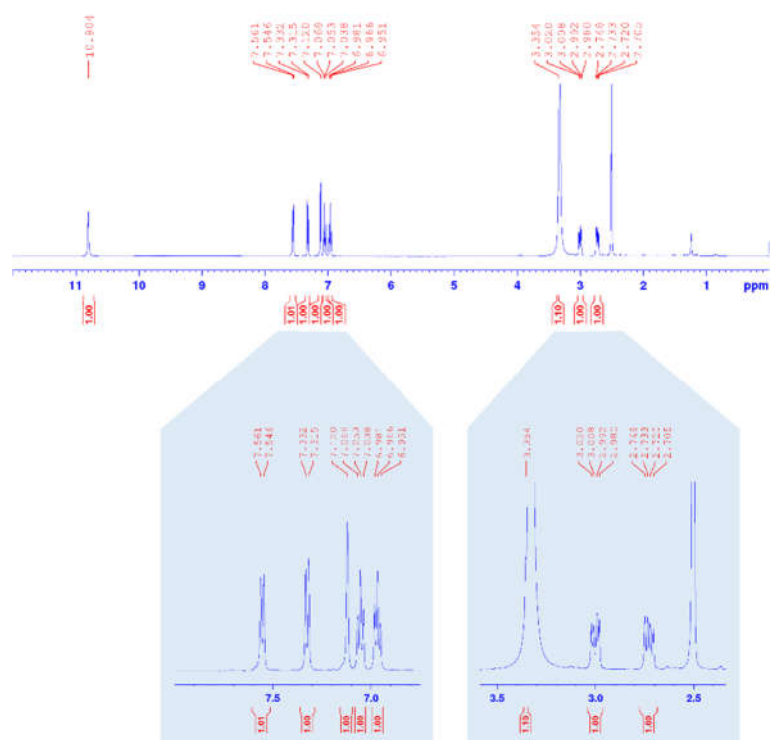

**Figure S2.**  $^1\text{H}$ -NMR spectrum of TrpHA.

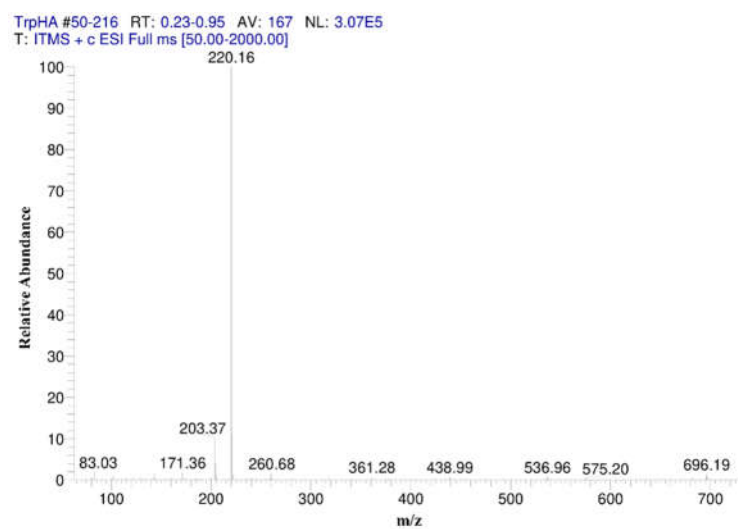

**Figure S3.** ESI-MS spectrum of TrpHA.

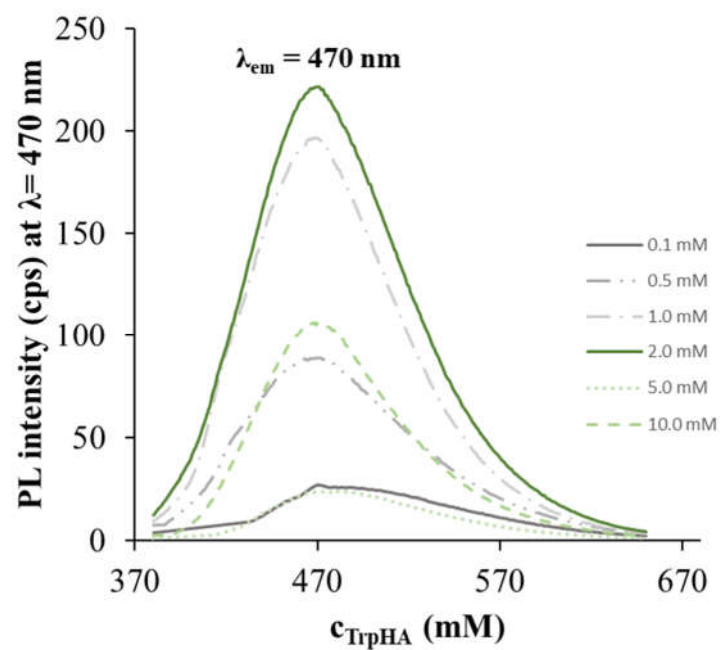

**Figure S4.** Representative emission spectra of TrpHA-Au NCs-containing dispersions using different TrpHA concentration ( $c_{\text{Au}} = 1.0$  mM, pH = 7.0).

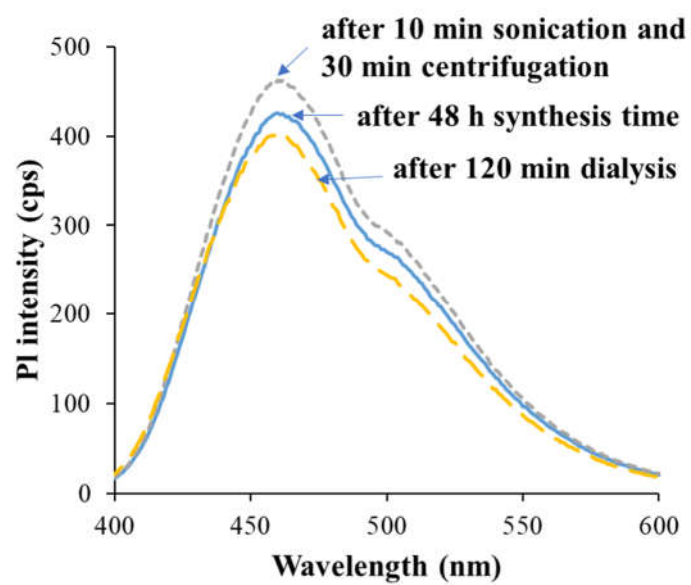

**Figure S5.** Emission spectra of the TrpHA-Au NCs after different treatments ( $c_{\text{Au}} = 1.0 \text{ mM}$ , after 48 h synthesis time)

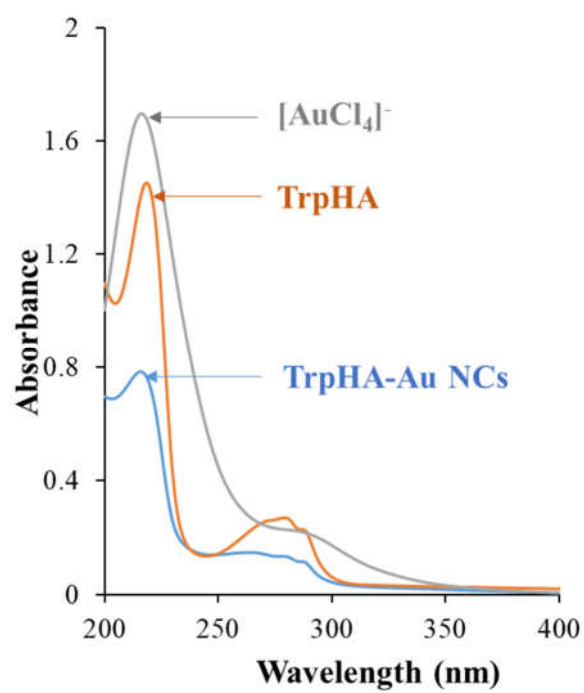

**Figure S6.** Absorbance spectra of the  $[\text{AuCl}_4]^-$  ( $c = 0.1 \text{ mM}$ ), the pure TrpHA ligand ( $c = 1.0 \text{ mM}$ ) and the TrpHA-Au NCs ( $c_{\text{Au}} = 1.0 \text{ mM}$ ).

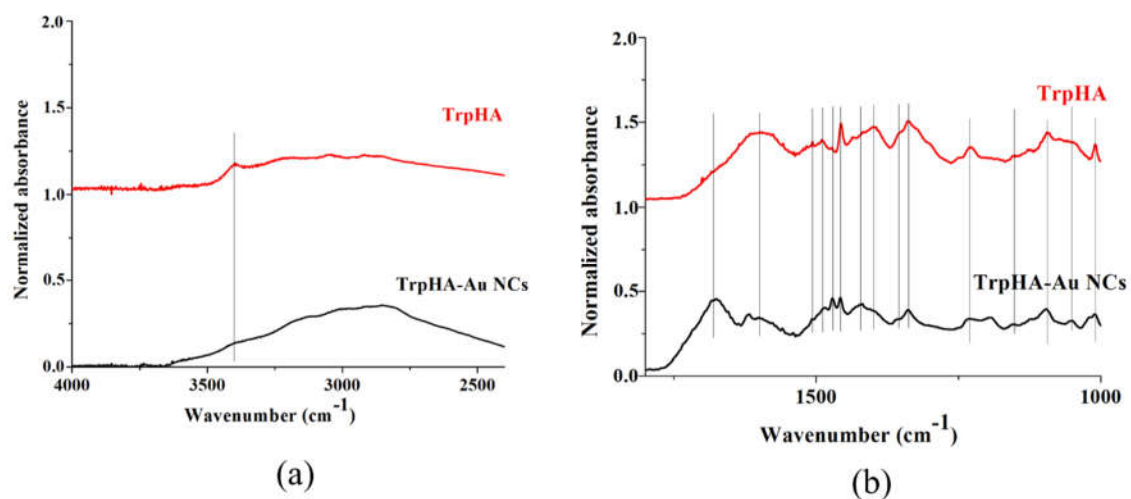

**Figure S7.** FT-IR spectra of the lyophilized powder form of the TrpHA and TrpHA-Au NCs in the range of 4000-2400  $\text{cm}^{-1}$  (a) and 1800-1000  $\text{cm}^{-1}$  (b) under same pH.

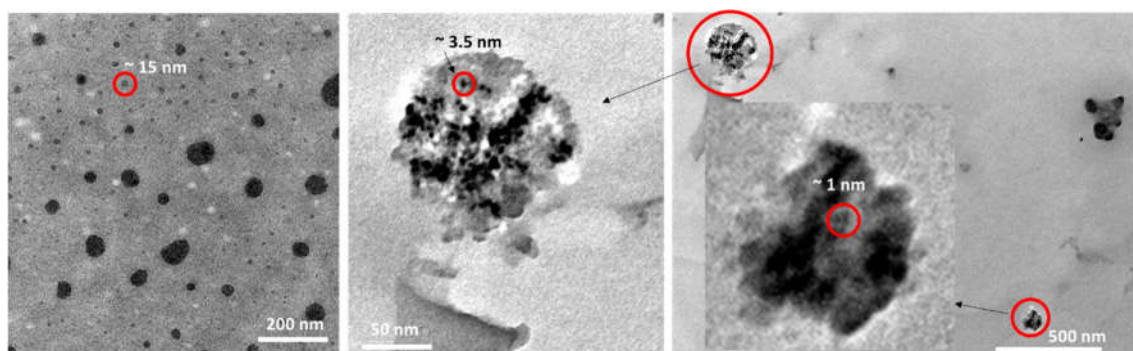

**Figure S8.** Representative HRTEM images of TrpHA-Au NCs-containing aqueous dispersion at different enlargements.



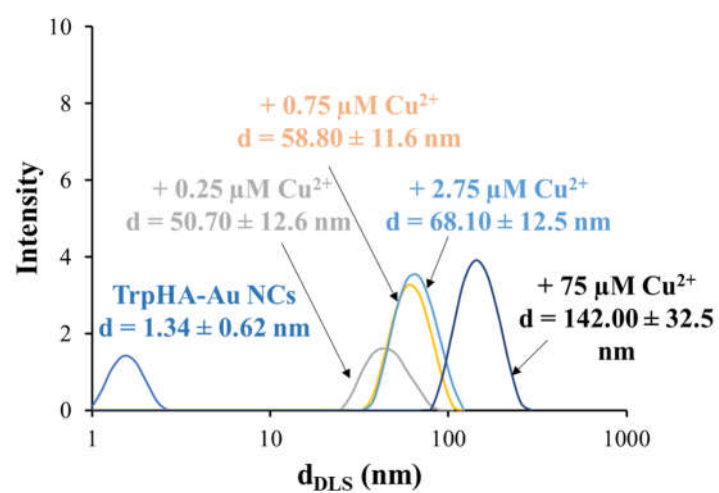

**Figure S9.** DLS curves of the TrpHA-Au NCs in the absence and in the presence of increasing concentration of  $Cu^{2+}$ -ions

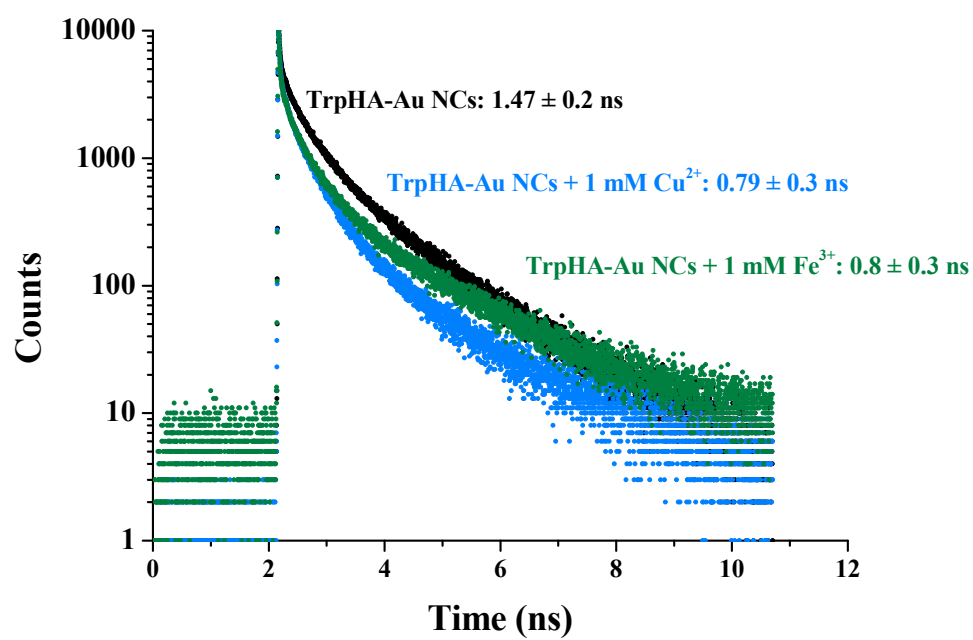

**Figure S10.** The typical fluorescence decay curves of the TrpHA-Au NCs before (black) and after the addition of  $\text{Cu}^{2+}$ - (blue) and  $\text{Fe}^{3+}$ - (green) ions using 1 mM metal ion concentration ( $c_{\text{Au}} = 0.25$  mM)
